# Supplementary material for: Profiling Italian cat and dog owners’ perceptions of pet food quality traits
Source: PubMed Central journal article supplement (PMC7216655; doi:10.1186/s12917-020-02357-9), 2020-05-11
Supplement: 12917_2020_2357_MOESM1_ESM.pdf [file 12917_2020_2357_MOESM1_ESM.pdf]

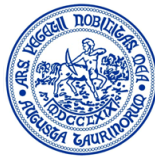

Università di Torino

Dipartimento di Scienze Veterinarie

## Questionnaire: how is pet food quality assessed?

### Part 1: Participant's profile

**Gender:**

- Female
- Male

**Age:**

- 18–34 years
- 35–50 years
- 51–64 years
- More than 64 years

**Geographical area:**

- North-West
- North-East
- Center
- South and Islands

**Education:**

- Primary / Secondary school
- High school / Professional qualification
- Degree / Postgraduate specialization

**Occupation:**

- Student
- Work at home
- Retired
- Worker
- Other (specify)

**Animal owned:**

- Dogs
- Cats
- Dogs and cats

**Type of purchased pet food:**

- Dry food only (kibbles)
- Wet food only (cans / trays)
- Both kibble and cans

**Preferred marketing channel (give only one answer):**

- Supermarket
- Pet store
- Online

**Where do you find the information you need to make your purchase decision? (give only one answer)**

- Online – Blog
- Online – Brand website
- Veterinarian
- Relatives and friends' advice
- Other (specify)

## Part 2: Pet food characteristics seen as quality indicators

Score the following characteristics, indicating how important they are to you to ensure your pet food products a high level of quality.

### Score from 1 to 5

1 = not important at all

2 = not very important

3 = quite important

4 = very important

5 = fundamental

### Question: "To be a quality pet food product, it must..."

|                                             |   |   |   |   |   |
|---------------------------------------------|---|---|---|---|---|
| readily consumed by my dog/cat              | 1 | 2 | 3 | 4 | 5 |
| give my dog / cat a nice coat               | 1 | 2 | 3 | 4 | 5 |
| allow my dog / cat to produce normal stools | 1 | 2 | 3 | 4 | 5 |
| have a good smell                           | 1 | 2 | 3 | 4 | 5 |
| look good                                   | 1 | 2 | 3 | 4 | 5 |
| clearly indicate where it is produced       | 1 | 2 | 3 | 4 | 5 |
| be cruelty-free                             | 1 | 2 | 3 | 4 | 5 |
| label comprehension                         | 1 | 2 | 3 | 4 | 5 |
| contain natural ingredients                 | 1 | 2 | 3 | 4 | 5 |
| have meat at its main ingredients           | 1 | 2 | 3 | 4 | 5 |
| contain fresh meat                          | 1 | 2 | 3 | 4 | 5 |
| have a high percentage of protein           | 1 | 2 | 3 | 4 | 5 |
| not contains cereals                        | 1 | 2 | 3 | 4 | 5 |
| be of a well-known brand                    | 1 | 2 | 3 | 4 | 5 |
| cost more than the others                   | 1 | 2 | 3 | 4 | 5 |
| come in recyclable packaging                | 1 | 2 | 3 | 4 | 5 |
