# Supplementary material for: Profiling Italian cat and dog owners’ perceptions of pet food quality traits
Source: PubMed Central journal article supplement (PMC7216655; doi:10.1186/s12917-020-02357-9), 2020-05-11
Supplement: 12917_2020_2357_MOESM2_ESM.pdf [file 12917_2020_2357_MOESM2_ESM.pdf]

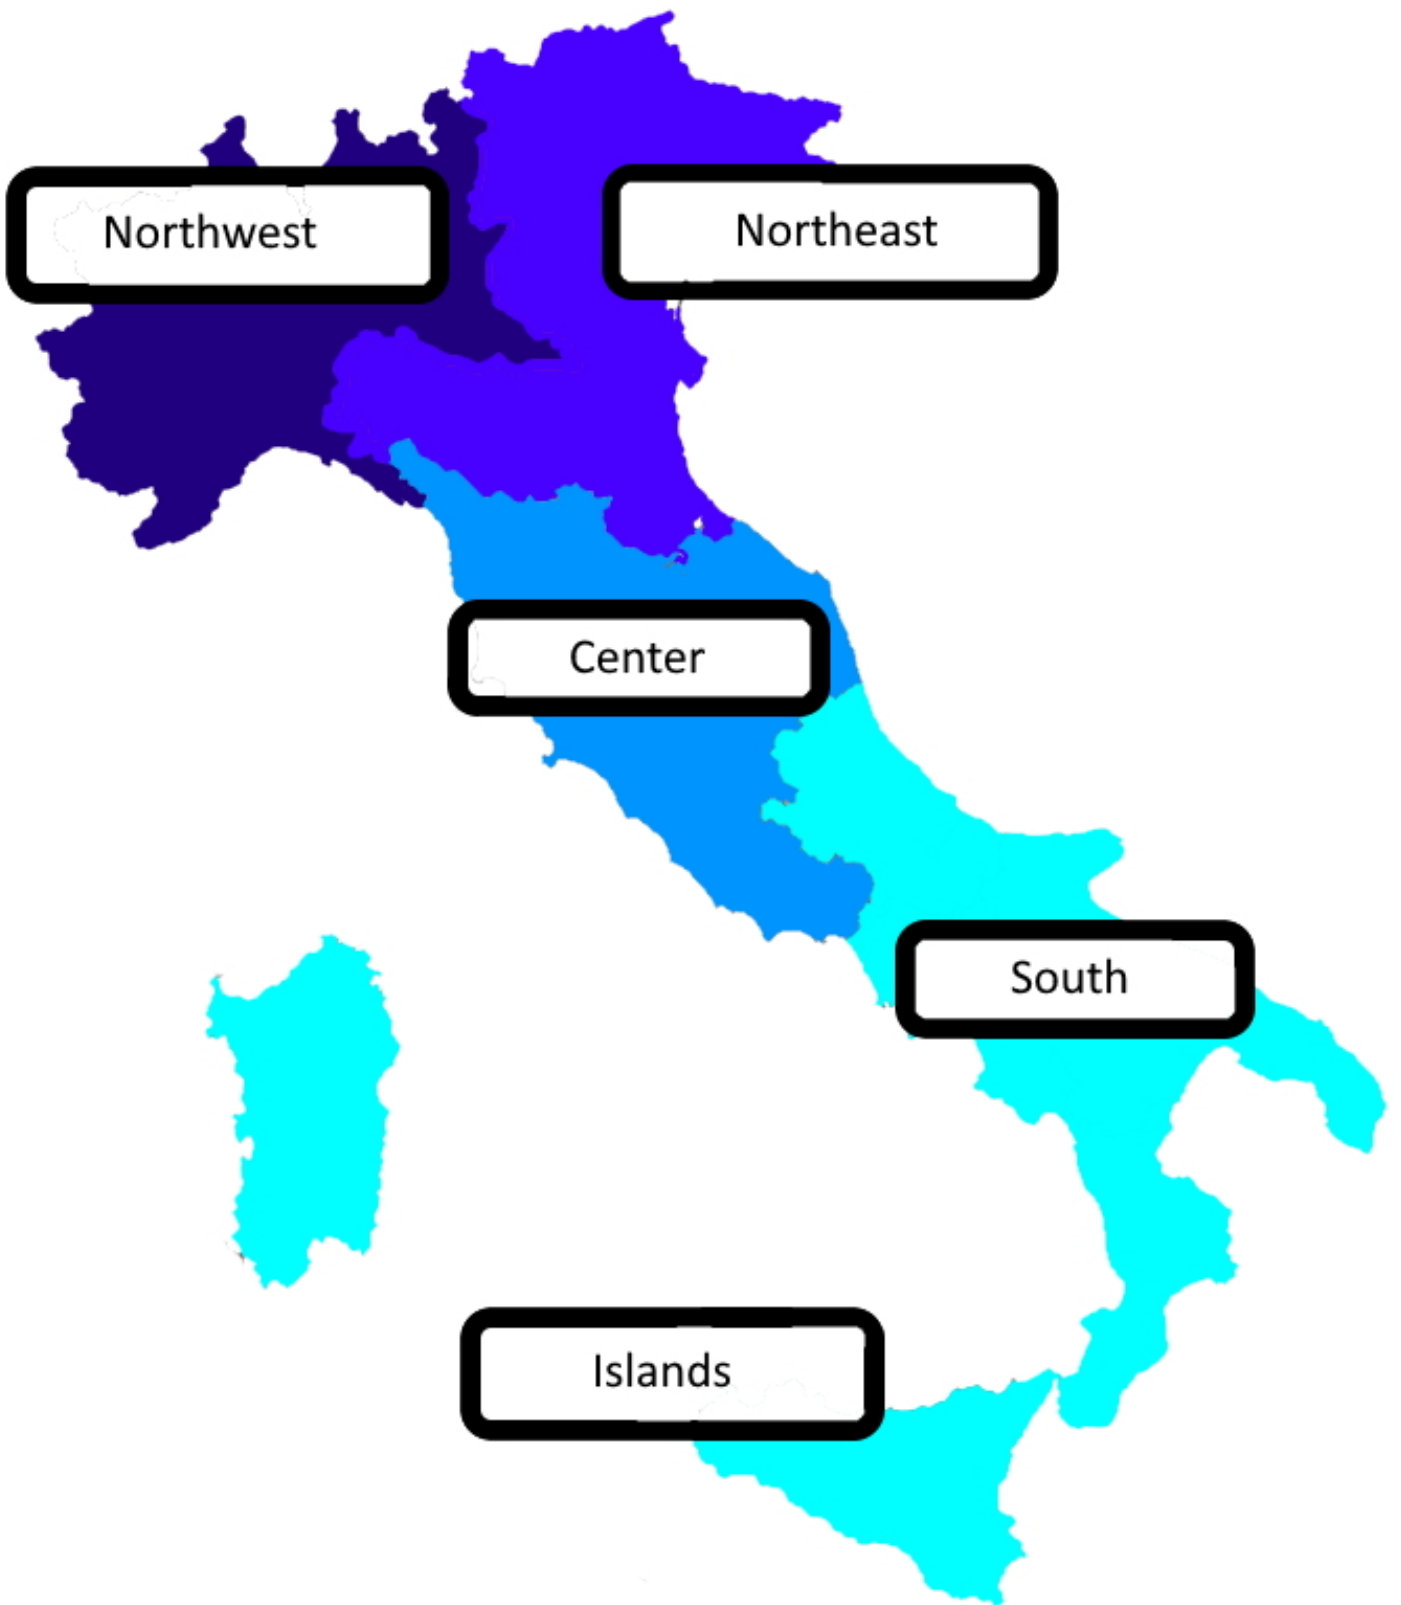

Northwest

Northeast

Center

South

Islands
